# Supplementary material
Source: Springer Nature journal article supplement (https://www.springermedizin.de/resource/supplementary/12958_2009_518_MOESM1_ESM.pdf/9568194)
Supplement: MOESM1 [file 9568194]

**A**

```

=====
α, β, γ      MTTQRWILAFCLSLASVFGIVLELFKTKEILTYTCRTFGSGGIVQPFKGESYYVRSDCPFKL 60
1.1-1.4     MTTQQWILAFCLSLASVFGIVLELFKTKEILTYTCRTFGSGGIVQPFKGESYYVRSDCPFKL 60
4           MTTQRWILAFCLSLASVSGIVLELFKTKEILTYTCRTFGSGGIVQPFKGESYYVRSDCPFKL 60
type 1A-C   MTTQRRILAFSLSLASVFGIVLELLKTKETQTYTCRTFGSGGIVQPFQGESYYVRSDCPFTL 60
type-2      MTTQRWILAFCLSLASVFGIVKLEFKTNETQTYTCRTFGSGGIVQPFKGESYYVRSDCQFRL 60
2           MTTQRWILAFCLSLA-----TYTCRTFGSGGIVQPFKGESYYVRSDCQFIL 45
3           MTTQRWILAFCLSLA-----TYTCRTFGSGGIVQPFKGESYYVRSDCQFIL 45

```

```

α, β, γ      TSFNVNRGEYSVTIRRGHNGLLVQVEI I IINKVTTLLQNGHILVQNK----- 106
1.1-1.4     TSFNVNRGEYSVTIRRGHNGLLVQVEI I IINKVTTLLQNGNILVQNK----- 106
4           TSFNVNRGEYSVTIRRGHNGLLVQVEI I IINKVTTLLQNGHILVQNK----- 106
type 1A-C   TSFNVNQGEYSVTIRRGHNGLLVQVEI VLNNAVTTLLQDGHVVVKNK----- 106
type-2      ISFTVNQKEYSVTIRRGHNGLLVQVKI I IINKVTTLLQNGHVVVKNKKFELRQKTGLGHRH 120
2           IGFTVNGKEYSVTIRRGHNGLLVQVEI I IINKVTTLLQNGHVVVKSALFELRQKTGLGHRH 105
3           IGFTVNGKEYSVTIRRGHNGLLVQVEI I IINKVTTLLQNGHVVVKSALFELRQKTGLGHRH 105

```

```

α, β, γ      -----SVSLPYDHQYQHIFKYGIYTRLRSLLPFTV TWHNVHGGINSLWVTLESELCT 159
1.1-1.4     -----SVSLPYDHQYQHIFKYGIYTRLRSLLPFTV TWHNVHGGINSLWVTLESELCT 159
4           -----SVSLPYDHQYQHIFKYGIYTRLRSLLPFTV TWHNVHGGINSLWVTLESELCT 159
type 1A-C   -----SVSDPCDQKYQHIFKYGIYTRLKSSLLPFSVTWHSVCGGINSLWVTLESELNT 159
type-2      QWRRQRLKVTHP CNRKYQHIFKYGIYNRKSSLLPFSVTWNVYGGINSLWVTLESKLT 180
2           QWRRQRLKVTHP CNRKYQHIFKYGIYNRKSSLLPFSVTWNVHGGINSLWVTLESELNT 165
3           QWRRQRLKVTHP CNRKYQHIFKYGIYNRKSSLLPFSVTWNVHGGINSLWVTLESELNT 165

```

```

=====
α, β, γ      DMCGLCGQNVAGHRDELIRDSKLDHDKIRDPVLRKNHICRFFFLKTKNCLQDNNSHY 219
1.1-1.4     DMCGLCGQNVAGHRDELIRDSKLDHDKKIKDPVLRKNHICRQFFFRKTKNCLQDNNSHY 219
4           DMCGLCGQNVAGHRDELIRDSKLDHDKIRDPVLRKNHICRFFFRKTKNCLQDNNSHY 219
type 1A-C   TTSGLCGQNVAGHRDELIRDSKLDHDKNTSSPVLQKNDICRQFFQEIKDCVQYNNSHY 219
type-2      TTSGLCGQNIAGHRDELIRDSKLDHDKNTSSPVLQKNDICRQFFQEIKDCVQYNNSHY 240
2           TTSGLCGQNIAGHRDELIRDSKLDHDKNTSSPVLQKNDICRQFFQEIKDCVQYNNSHY 225
3           TTSGLCGQNIAGHRDELIRDSKLDHDKNTSSPVLQKNDICRQFFQEIKDCVQYNNSHY 225

```

**B**

```

α, β      TTIGINFQIQMSPEIHLFIDAPD--PSSDKIKGLCGNSNSDITDDFTTNSGI IENSAKPF 514
1.1-1.4  TTIGINFQIQMSPEIHLFIDAPD--TSSDKIKGLCGNSNSDITDDFTTNSGI IENSAKPF 514
4         TTIGINFQIQMSPEIQLFIDAPD--TSNDKIKGLCGNSNSDITDDFTANSGI IENSAQPF 514
Type 1A-C TTSGLFFQIQLSPEIQLFIDAPD--NSNYKIKGLCGNSNNNTTDDFTTNSGVIENSAEPF 517
type-2   TTSGLFFQIQLSPEIQLFIDAPNQSKSDDKIEGLCGNSNRNTTDDFTTETGFFPNSVQLF 540
2        TTSGLFFQIQLSPEIQLFIDAPNQSKSDDKIEGLCGNSNRNTTDDFTTETGFFPNSVQLF 525
3        TTSGLFFQIQLSPEIQLFIDAPNQSKSDDKIEGLCGNSNRNTTDDFTANSGI IENSAQPF 525

```

**C**

```

1.1      KNRVCGLCGNFDSNEMNDLSISGSSVSGPMAFGNCWKVQTPPCSDVTTDIFPCERNSYCA 994
4        KNRVCGLCGNFDSNEMNDLSISGSSVSGPMAFGNCWKVQTPPCSDVTTDIFPCERNSYCA 994

```
